# Supplementary material
Source: Springer Nature journal article supplement (https://www.springermedizin.de/resource/supplementary/12911_2011_624_MOESM2_ESM.pdf/9525928)

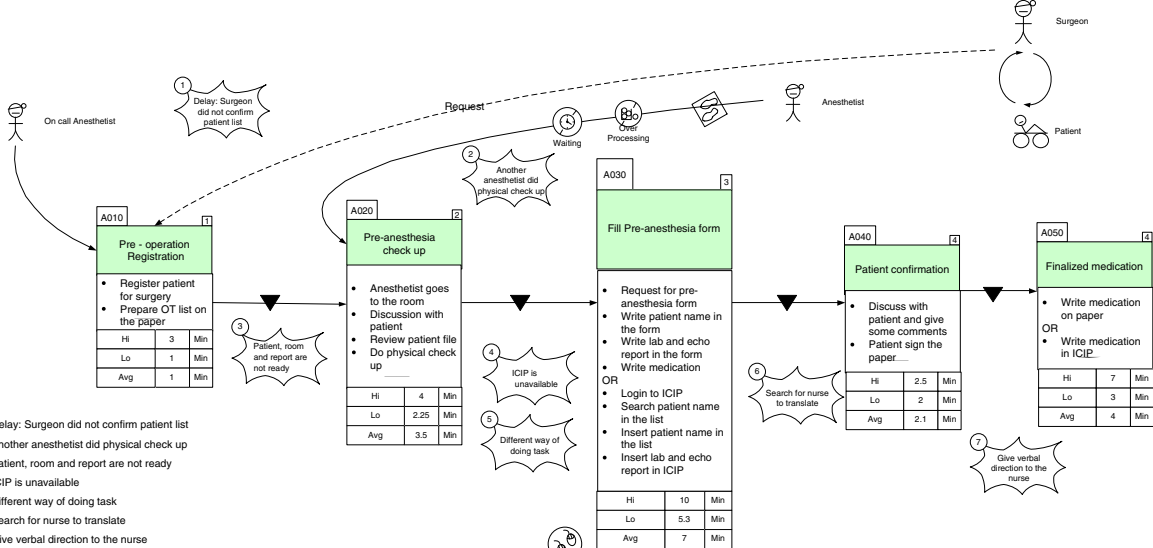

- Delay: Surgeon did not confirm patient list
- Another anesthetist did physical check up
- Patient, room and report are not ready
- ICIP is unavailable
- Different way of doing task
- Search for nurse to translate
- Give verbal direction to the nurse

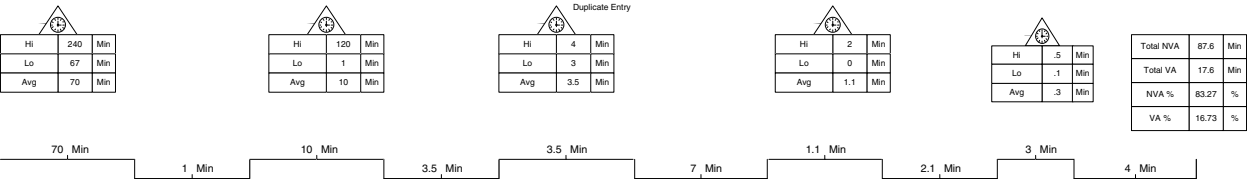

Supplement: MOESM2 [file 9525928]
